# Supplementary material
Source: PubMed Central journal article supplement (PMC9444820)

### Supplemental Figure 1. Flowchart of Literature Review

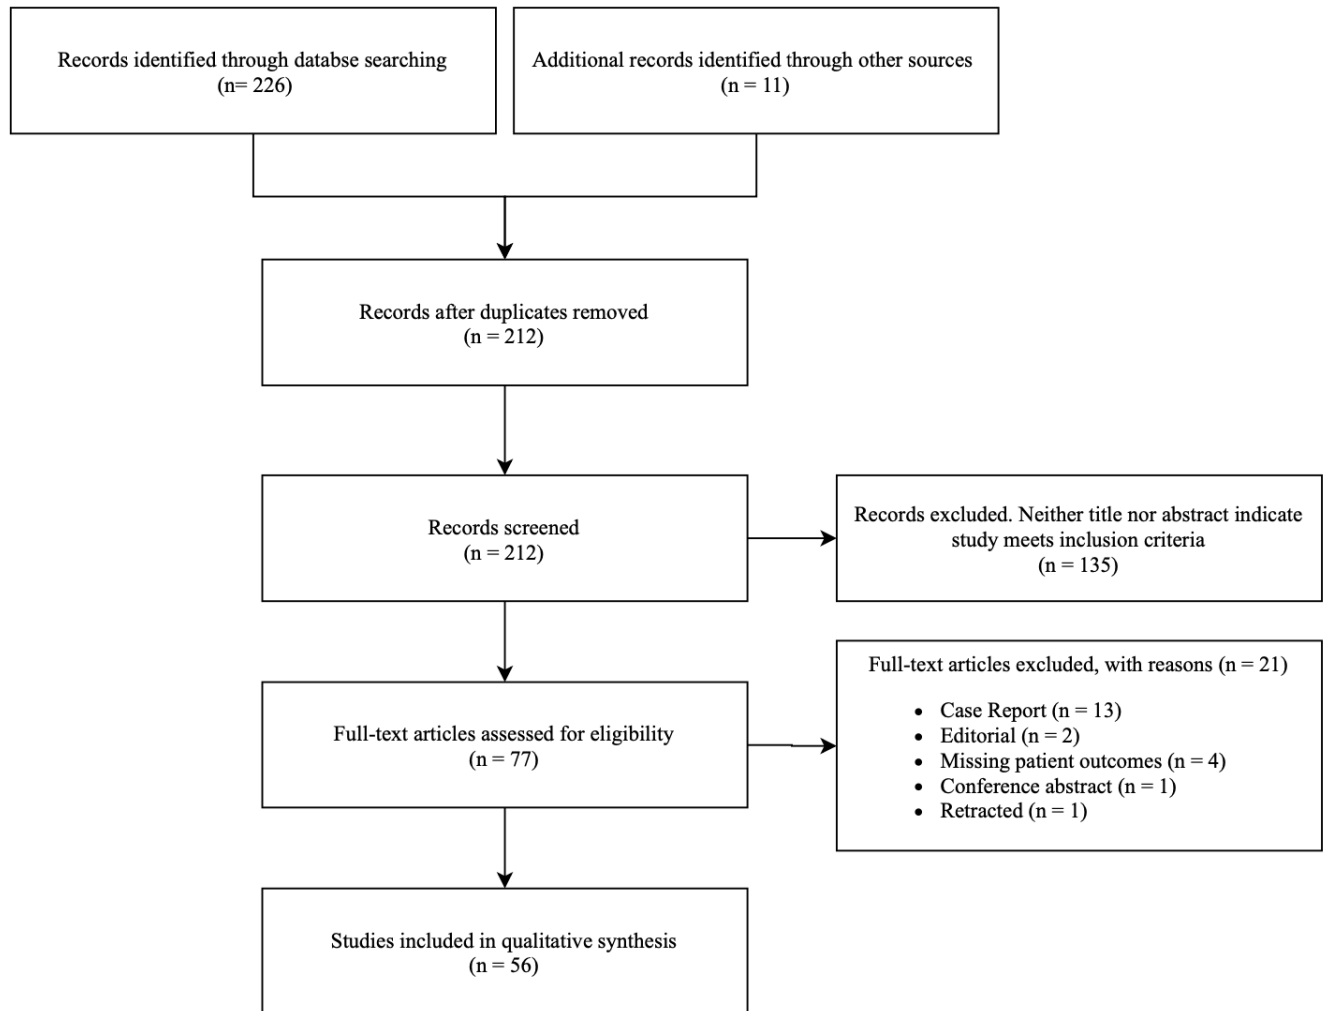

Supplement: sj-pdf-1-jtt-10.1177_1357633X20960636.pdf [file sj-pdf-1-jtt-10.1177_1357633X20960636.pdf]
